# Supplementary material
Source: PubMed Central journal article supplement (PMC6129987)
Supplement: NIHMS933709-supplement-1.pdf [file NIHMS933709-supplement-1.pdf]

## Statistics

Exact  $P$  values are provided for those  $> 0.001$ .

**Fig. 1g**, Two-way ANOVA; treatment  $F(1, 3479) = 2900.22$ ,  $P < 0.001$ ; time  $F(4, 3479) = 584.57$ ,  $P < 0.001$ ; interaction  $F(4, 3479) = 575.14$ ,  $P < 0.001$ . Bonferroni's post-hoc. LPS 1 h vs. NaCl 1 h,  $P < 0.001$ , 95% CI (-0.41,-0.34); LPS 2 h vs. NaCl 2 h,  $P < 0.001$ , 95% CI (-0.73,-0.65); LPS 3 h vs. NaCl 3 h,  $P < 0.001$ , 95% CI (-0.17,-0.10); LPS 4 h vs. NaCl 4 h,  $P < 0.001$ , 95% CI (-0.16,-0.09).

**Fig. 1i**, One-way RM ANOVA,  $F(6, 24) = 233.50$ ,  $P < 0.001$ . Tukey's post-hoc. 40 vs 46°C,  $P < 0.001$ , 95% CI (-98.7,-71.3); 40 vs 48°C,  $P < 0.001$ , 95% CI (-102.2,-74.7); 40 vs 50°C,  $P < 0.001$ , 95% CI (-108.7,-81.3); 40 vs 52°C,  $P < 0.001$ , 95% CI (-105.7,-78.2).

**Fig. 2a**, Two-way ANOVA; treatment  $F(1, 4450) = 4222.08$ ,  $P < 0.001$ ; time  $F(9, 4450) = 54.95$ ,  $P < 0.001$ ; interaction  $F(9, 4450) = 81.81$ ,  $P < 0.001$ . Bonferroni's post-hoc. Chloroquine vs NaCl 1 min,  $P < 0.001$ , 95% CI (-0.11,-0.04); Chloroquine vs NaCl 2 min,  $P < 0.001$ , 95% CI (-0.13,-0.06); Chloroquine vs NaCl 3 min,  $P < 0.001$ , 95% CI (-0.19,-0.12); Chloroquine vs NaCl 4 min,  $P < 0.001$ , 95% CI (-0.20,-0.13); Chloroquine vs NaCl 5 min,  $P < 0.001$ , 95% CI (-0.21,-0.14); Chloroquine vs NaCl 6 min,  $P < 0.001$ , 95% CI (-0.22,-0.15); Chloroquine vs NaCl 7 min,  $P < 0.001$ , 95% CI (-0.25,-0.18); Chloroquine vs NaCl 8 min,  $P < 0.001$ , 95% CI (-0.30,-0.23); Chloroquine vs NaCl 9 min,  $P < 0.001$ , 95% CI (-0.38,-0.31); Chloroquine vs NaCl 10 min,  $P < 0.001$ , 95% CI (-0.34,-0.27).

**Fig. 2c**, Student's t-test (two-tailed),  $t(14) = 2.60$ ,  $P = 0.021$ , 95% CI (2.91,30.34).

**Fig. 2d**, Student's t-test (two-tailed),  $t(14) = 2.92$ ,  $P = 0.011$ , 95% CI (8.57,56.18).

**Fig. 2f**, Student's t-test (two-tailed),  $t(14) = 8.37$ ,  $P < 0.001$ , 95% CI (14.03,41.22).

**Fig. 3f**, One-way RM ANOVA,  $F(7, 281) = 569.97$ ,  $P < 0.001$ . Tukey's post-hoc. No fast vs 0 min,  $P < 0.001$ , 95% CI (0.07,0.11); 0 vs 10 min,  $P < 0.001$ , 95% CI (0.08,0.12); 20 vs 30 min,  $P < 0.001$ , 95% CI (-0.04,-0.002); 30 vs 40 min,  $P < 0.001$ , 95% CI (-0.09,-0.05); 40 vs 50 min,  $P < 0.001$ , 95% CI (-0.17,-0.13).

**Fig. 4e**, Two-way RM ANOVA; treatment  $F(1, 14) = 553.51$ ,  $P < 0.001$ ; time  $F(3, 14) = 46.94$ ,  $P < 0.001$ ; interaction  $F(3, 14) = 5.21$ ,  $P = 0.004$ . Bonferroni's post-hoc. Trial 1, GFP vs TetTox,  $P < 0.001$ , 95% CI (-0.41,-0.09); trial 2, GFP vs TetTox,  $P = 0.039$ , 95% CI (-0.33,-0.004).

**Fig. 6c**, Two-way RM ANOVA; treatment  $F(1, 434) = 277.36$ ,  $P < 0.001$ ; time  $F(29, 434) = 5.09$ ,  $P < 0.001$ ; interaction  $F(29, 434) = 2.84$ ,  $P < 0.001$ .

**Fig. 6d**, Two-way RM ANOVA; treatment  $F(1, 434) = 277.64$ ,  $P < 0.001$ ; time  $F(29, 434) = 10.68$ ,  $P < 0.001$ ; interaction  $F(29, 434) = 1.72$ ,  $P = 0.012$ .

**Extended Data Fig. 1d**, Student's t-test (two-tailed, paired),  $t(316) = -28.25$ ,  $P < 0.001$ , 95% CI (-0.04,-0.04).

**Extended Data Fig. 2b**, One-way RM ANOVA,  $F(6, 285) = 419.25$ , Tukey's post-hoc. 40 vs 46°C,  $P < 0.001$ , 95% CI (-3.02,-2.31); 40 vs 48°C,  $P < 0.001$ , 95% CI (-3.06,-2.35); 40 vs 50°C,  $P < 0.001$ , 95% CI (-3.75,-3.04); 40 vs 52°C,  $P < 0.001$ , 95% CI (-4.31,-3.60); 46 vs 50°C,  $P <$

0.001, 95% CI (-1.08,-0.37); 46 vs 52°C,  $P < 0.001$ , 95% CI (-1.65,-0.94); 50 vs 52°C,  $P < 0.001$ , 95% CI (-0.92,-0.21).

**Extended Data Fig. 2e**, Student's t-test (two-tailed, paired),  $t(110) = -11.58$ ,  $P < 0.001$ , 95% CI (-0.64,-0.46).

**Extended Data Fig. 2h**, One-way RM ANOVA,  $F(4,125) = 2379.77$ ,  $P < 0.001$ , Tukey's post-hoc. 40 vs 48°C,  $P < 0.001$ , 95% CI (-2.25,-1.33); 40 vs 52°C,  $P < 0.001$ , 95% CI (-8.81,-7.89); 40 vs 56°C,  $P < 0.001$ , 95% CI (-13.61,-12.68); 48 vs 52°C,  $P < 0.001$ , 95% CI (-7.02,-6.10); 48 vs 55°C,  $P < 0.001$ , 95% CI (-11.82,-10.89); 52 vs 56°C,  $P < 0.001$ , 95% CI (-5.26,-4.34).

**Extended Data Fig. 3a**, Student's t-test (two-tailed, paired),  $t(282) = 29.47$ ,  $P < 0.001$ , 95% CI (0.08,0.09).

**Extended Data Fig. 3b**, One-way RM ANOVA,  $F(3,281) = 380.61$ ,  $P < 0.001$ , Tukey's post-hoc. -2 vs -1 s,  $P < 0.001$ , 95% CI (0.03,0.04); -1 vs 0 s,  $P < 0.001$ , 95% CI (0.02,0.03).

**Extended Data Fig. 4d**, Student's t-test (two-tailed, paired),  $t(246) = -16.99$ ,  $P < 0.001$ , 95% CI (-0.034,-0.027).

**Extended Data Fig. 4e**, Student's t-test (two-tailed, paired),  $t(243) = -7.95$ ,  $P < 0.001$ , 95% CI (-0.020,-0.012).

**Extended Data Fig. 4f**, Student's t-test (two-tailed, paired),  $t(253) = 18.64$ ,  $P < 0.001$ , 95% CI (0.04,0.05).

**Extended Data Fig. 4g**, Student's t-test (two-tailed, paired),  $t(246) = -26.00$ ,  $P < 0.001$ , 95% CI (-0.041,-0.035).

**Extended Data Fig. 4h**, Student's t-test (two-tailed, paired),  $t(243) = 12.35$ ,  $P < 0.001$ , 95% CI (0.015,0.021).

**Extended Data Fig. 4i**, Student's t-test (two-tailed, paired),  $t(253) = 22.00$ ,  $P < 0.001$ , 95% CI (0.041,0.048).

**Extended Data Fig. 5d**, Student's t-test (two-tailed, paired),  $t(219) = -20.90$ ,  $P < 0.001$ , 95% CI (-0.066,-0.055).

**Extended Data Fig. 5e**, Student's t-test (two-tailed, paired),  $t(217) = -14.42$ ,  $P < 0.001$ , 95% CI (-0.047,-0.035).

**Extended Data Fig. 6a**, One-way RM ANOVA,  $F(2, 213) = 90.11$ ,  $P < 0.001$ , Tukey's post-hoc. Tone trial 1 vs 15,  $P < 0.001$ , 95% CI (1.01,2.21); tone trial 15 vs 30,  $P < 0.001$ , 95% CI (1.20,2.39).

**Extended Data Fig. 6b**, One-way RM ANOVA,  $F(2, 168) = 2.36$ ,  $P = 0.10$

**Extended Data Fig. 6d**, One-way RM ANOVA,  $F(3, 487) = 1428.55$ ,  $P < 0.001$ , Tukey's post-hoc. Pre 1 vs Pre 2,  $P < 0.001$ , 95% CI (-0.11,-0.09); Pre 1 vs Post 1,  $P < 0.001$ , 95% CI (0.17,0.19); Pre 1 vs Post 2,  $P < 0.001$ , 95% CI (0.27,0.29); Pre 2 vs Post 1,  $P < 0.001$ , 95% CI (0.05,0.07); Pre 2 vs Post 2,  $P < 0.001$ , 95% CI (0.15,0.17); Post 1 vs Post 2,  $P < 0.001$ , 95% CI (-0.13,-0.11).

**Extended Data Fig. 6e**, One-way RM ANOVA,  $F(3, 487) = 1476.10$ , Tukey's post-hoc. Post 1 freezing vs Post 1 not freezing,  $P < 0.001$ , 95% CI (-0.28,-0.26); Post 2 freezing vs Post 2 not freezing,  $P < 0.001$ , 95% CI (-0.21,-0.18).
